# Supplementary material for: Deep learning-based enhancement of epigenomics data with AtacWorks
Source: PubMed Central journal article supplement (PMC7940635; doi:10.1038/s41467-021-21765-5), 2021-03-08
Supplement: 41467_2021_21765_MOESM1_ESM.pdf [file 41467_2021_21765_MOESM1_ESM.pdf]

## Supplementary Information

### Deep learning-based enhancement of epigenomics data with AtacWorks

Avantika Lal<sup>1,\*</sup>, Zachary D. Chiang<sup>2,\*</sup>, Nikolai Yakovenko<sup>1</sup>, Fabiana M. Duarte<sup>2</sup>, Johnny Israeli<sup>1 †</sup>, Jason D. Buenrostro<sup>2 †</sup>

<sup>1</sup>NVIDIA Corporation, 2788 San Tomas Expy, Santa Clara, California 95051, USA.

<sup>2</sup>Department of Stem Cell and Regenerative Biology, Harvard University, Cambridge, Massachusetts 02138, USA.

\*Equal Contributions

†Co-corresponding

Correspondence should be addressed to: [jisraeli@nvidia.com](mailto:jisraeli@nvidia.com) or [jason\\_buenrostro@harvard.edu](mailto:jason_buenrostro@harvard.edu).

#### **This document contains:**

Supplementary Note 1

Supplementary Tables 1-14

Supplementary Figures 1-9

Supplementary References

## Supplementary Note 1

Another study<sup>1</sup> recently reported the use of a deep learning model for denoising and peak calling from low-input ATAC-seq. The software used in this study was released as PillowNet (<https://github.com/daquang/PillowNet>).

Here we evaluate and compare:

1. The AtacWorks and PillowNet software tools;
2. The ResNet architecture used in AtacWorks with the U-Net architecture used in PillowNet; and
3. The ResNet architecture used in AtacWorks with an independently designed and tuned U-Net architecture.

### 1. Comparison of AtacWorks and PillowNet softwares

A bulk ATAC-Seq dataset from CD4+ T cells was sampled to a depth of 50 million reads to generate clean, high-coverage data, and then subsampled to a depth of 1 million reads.

Both AtacWorks and PillowNet models were trained, with their respective default parameters, to learn a mapping between the noisy and clean datasets. The code at <https://github.com/daquang/PillowNet> was used to train the PillowNet model. Only a 12 Mb region of chromosome 1 was used for training and models were trained for 25 epochs.

Since the U-Net model in PillowNet predicts one output at a time, we trained two separate models, one for denoising and one for peak calling. PillowNet is set up to run on CPUs, whereas AtacWorks runs only on GPUs. The high parallelism of GPUs allows for significantly faster training and prediction.

For this small training dataset, the total time required to train both PillowNet models was 85 minutes (39 minutes for the denoising model and 46 minutes for the peak classification model) with 64 CPU cores. On the other hand, we were able to use AtacWorks to train a single model performing both denoising and peak calling in 6 minutes using a single NVIDIA V100 GPU and in 4.5 minutes using 8 V100 GPUs on an NVIDIA DGX-1 server.

We were unable to train PillowNet on a larger dataset using the provided code, as the software did not succeed in loading the larger training dataset.

### 2. Comparison of the ResNet architecture used in AtacWorks with the U-Net architecture used in PillowNet

Since we were unable to apply the PillowNet code to chromosome-scale data, we instead re-implemented the U-Net architecture used in PillowNet in the AtacWorks framework. This allowed us to solely compare the default model architectures used by AtacWorks and PillowNet, in the same environment.

We were able to train U-Net models for denoising and peak calling on the aforementioned CD4+ T cell dataset with the U-Net architecture, using the loss functions and learning rate described<sup>1</sup>. We also trained a

standard AtacWorks ResNet model to perform both denoising and peak calling using default AtacWorks parameters (Supplementary Table 17).

The runtime for training using 8 Tesla V100 16GB GPUs was:

- AtacWorks ResNet: 185 seconds per epoch (regression + classification)
- U-Net (PillowNet reimplementation): 168 seconds per epoch (regression model) + 168 seconds per epoch (classification model)

We then applied the trained models to an ATAC-seq dataset from erythroblasts sampled to the same read depth.

We found that while the U-Net architecture performs well at both denoising and peak calling from this low-coverage dataset, the ResNet model performs better on all metrics (Supplementary Table 7).

We also note that PillowNet, as well as another previous method, Coda<sup>2</sup>, train models that perform either denoising or peak calling, so that if both a denoised signal track and peak calls are needed, the user must train two independent models. The outputs of these two models need not be correlated with each other as the mappings they learn are independent of each other. On the other hand, AtacWorks performs denoising and peak calling jointly, so that the peak calls produced by AtacWorks from a noisy ATAC-seq dataset are a direct function of the denoised signal that it also produces.

### **3. Comparison of an AtacWorks ResNet model with an independently designed U-Net**

To explore the suitability of U-Net architectures for denoising and peak calling from noisy ATAC-seq data, we also independently designed and tuned a U-Net architecture for these tasks. To be consistent with the framework of AtacWorks, our U-Net architecture differed from the U-Net architecture used in PillowNet in several ways:

- a. We developed a single model for both denoising and peak calling.
- b. Whereas PillowNet uses both the noisy ATAC-seq signal and peak calls from MACS2 as input for classification, our U-Net model uses only the noisy ATAC-seq signal.
- c. Our model was trained with a joint MSE, Pearson correlation and BCE loss function, whereas PillowNet models are trained with MSE loss for regression and BCE loss for classification.

The runtime for training this independent U-Net model using 8 Tesla V100 16GB GPUs was:

- 254 seconds per epoch (regression + classification)

We tuned the hyperparameters of this model based on performance on the validation set consisting of a held-out chromosome. Performance was improved by using wider convolutional filters (25 bp compared to the 11 bp filters used in PillowNet). Nevertheless, the performance of this U-Net model on the task described above was comparable to that of the models based on the PillowNet architecture (Supplementary Table 7), and still did not match the performance of the ResNet model.

### **4. Note on ResNet and U-Net architectures**

While we cannot rule out the possibility that a U-Net architecture designed and tuned in a specific way would outperform the ResNet architecture used in AtacWorks, we found that in all of our tests, the ResNet architecture consistently performed best on both denoising and peak calling tasks.

U-Net models have shown excellent performance on a variety of tasks in computer vision. We cannot give a definitive answer as to why we have observed the ResNet architecture to outperform U-Net on this particular application. We note a few possible reasons why the ResNet may be more suitable than the U-Net for the tasks here:

1. The U-Net model contains “max pooling” layers which reduce the size of the data representation by retaining only the maximum value across neighboring units, thus reducing resolution. The ResNet architecture does not include max pooling layers and does not compress the size of the data representation, instead using dilated convolutions to combine information over a large genomic distance.
2. The final layer of the U-Net combines very low-resolution features learned by the first layers of the model with high-resolution features spanning kilobases, which are learned by the final layers. This may not be ideal due to the very different scales of the features being combined. In the ResNet architecture, skip connections only skip every three convolutional layers, thus transferring information from shallower to deeper layers of the model without combining features of drastically different scales.

Supplementary Table 1

| Coverage<br>(x million<br>reads) | Region             | Pearson<br>correlation |                                | MSE             |                                | Spearman<br>correlation |                                | AUPRC                      |                                | AUROC                      |                                | Equivalent<br>coverage             |                      |
|----------------------------------|--------------------|------------------------|--------------------------------|-----------------|--------------------------------|-------------------------|--------------------------------|----------------------------|--------------------------------|----------------------------|--------------------------------|------------------------------------|----------------------|
|                                  |                    | Sub-<br>sampled        | Sub-<br>sampled +<br>AtacWorks | Sub-<br>sampled | Sub-<br>sampled +<br>AtacWorks | Sub-<br>sampled         | Sub-<br>sampled +<br>AtacWorks | Sub-<br>sampled +<br>MACS2 | Sub-<br>sampled +<br>AtacWorks | Sub-<br>sampled +<br>MACS2 | Sub-<br>sampled +<br>AtacWorks | Based on<br>Pearson<br>correlation | Based<br>on<br>AUPRC |
| 0.2                              | Whole genome       | 0.2953                 | 0.5324                         | 124.4684        | 96.043                         | 0.0987                  | 0.1612                         | 0.0347                     | 0.1398                         | 0.5322                     | 0.6764                         | 0.8                                | 1.7                  |
| 1                                | Whole genome       | 0.5735                 | 0.8275                         | 120.5494        | 41.6286                        | 0.2056                  | 0.3153                         | 0.0977                     | 0.311                          | 0.5879                     | 0.8167                         | 3.8                                | 6.1                  |
| 5                                | Whole genome       | 0.8627                 | 0.9478                         | 101.9874        | 13.2582                        | 0.4192                  | 0.5441                         | 0.2782                     | 0.5048                         | 0.7513                     | 0.9173                         | 11.5                               | 14.8                 |
| 10                               | Whole genome       | 0.9374                 | 0.9659                         | 81.0098         | 8.2864                         | 0.5655                  | 0.6531                         | 0.4114                     | 0.6055                         | 0.8639                     | 0.9524                         | 15.2                               | 21.6                 |
| 20                               | Whole genome       | 0.9806                 | 0.9813                         | 46.3492         | 4.4977                         | 0.747                   | 0.7819                         | 0.5856                     | 0.7356                         | 0.9545                     | 0.9789                         | 27                                 | 34.1                 |
| 0.2                              | Chr10              | 0.2929                 | 0.5446                         | 120.5101        | 90.4098                        | 0.0955                  | 0.144                          | 0.0328                     | 0.1339                         | 0.5175                     | 0.6717                         |                                    |                      |
| 1                                | Chr10              | 0.5483                 | 0.8205                         | 116.8774        | 40.4792                        | 0.1993                  | 0.2793                         | 0.0885                     | 0.2883                         | 0.5708                     | 0.8023                         |                                    |                      |
| 5                                | Chr10              | 0.839                  | 0.941                          | 98.9833         | 13.0731                        | 0.4107                  | 0.5075                         | 0.2673                     | 0.4833                         | 0.7406                     | 0.9121                         |                                    |                      |
| 10                               | Chr10              | 0.9143                 | 0.9623                         | 79.2786         | 8.3869                         | 0.5548                  | 0.6251                         | 0.3962                     | 0.5852                         | 0.8556                     | 0.9486                         |                                    |                      |
| 20                               | Chr10              | 0.9661                 | 0.9797                         | 45.2997         | 4.5417                         | 0.7381                  | 0.7663                         | 0.5674                     | 0.7191                         | 0.9503                     | 0.9771                         |                                    |                      |
| 0.2                              | All peaks          | 0.5001                 | 0.5703                         | 5258.5034       | 3449.5449                      | 0.2556                  | 0.3176                         |                            |                                |                            |                                |                                    |                      |
| 1                                | All peaks          | 0.7941                 | 0.854                          | 5090.3765       | 1320.9353                      | 0.4009                  | 0.4814                         |                            |                                |                            |                                |                                    |                      |
| 5                                | All peaks          | 0.9498                 | 0.9632                         | 4294.8691       | 349.4973                       | 0.5557                  | 0.615                          |                            |                                |                            |                                |                                    |                      |
| 10                               | All peaks          | 0.9765                 | 0.9813                         | 3397.5979       | 180.4983                       | 0.6451                  | 0.6763                         |                            |                                |                            |                                |                                    |                      |
| 20                               | All peaks          | 0.9911                 | 0.9921                         | 1921.0201       | 73.2704                        | 0.7487                  | 0.7567                         |                            |                                |                            |                                |                                    |                      |
| 0.2                              | Non-peaks          | 0.0841                 | 0.0966                         | 14.1205         | 23.9647                        | 0.0798                  | 0.1372                         |                            |                                |                            |                                |                                    |                      |
| 1                                | Non-peaks          | 0.19                   | 0.2055                         | 13.7308         | 14.1319                        | 0.178                   | 0.2896                         |                            |                                |                            |                                |                                    |                      |
| 5                                | Non-peaks          | 0.4084                 | 0.4829                         | 11.868          | 6.0313                         | 0.3906                  | 0.5209                         |                            |                                |                            |                                |                                    |                      |
| 10                               | Non-peaks          | 0.5618                 | 0.6133                         | 9.725           | 4.585                          | 0.541                   | 0.6331                         |                            |                                |                            |                                |                                    |                      |
| 20                               | Non-peaks          | 0.743                  | 0.763                          | 6.0561          | 3.0196                         | 0.7312                  | 0.7682                         |                            |                                |                            |                                |                                    |                      |
| 0.2                              | Differential peaks | 0.3663                 | 0.5072                         | 1014.7882       | 776.6895                       | 0.142                   | 0.1874                         | 0.657                      | 0.7207                         | 0.5083                     | 0.5798                         |                                    |                      |
| 1                                | Differential peaks | 0.6682                 | 0.8145                         | 982.104         | 357.6288                       | 0.2673                  | 0.3376                         | 0.6793                     | 0.804                          | 0.5409                     | 0.6776                         |                                    |                      |
| 5                                | Differential peaks | 0.9004                 | 0.9451                         | 828.5622        | 116.9008                       | 0.4855                  | 0.5589                         | 0.7722                     | 0.8862                         | 0.6723                     | 0.8059                         |                                    |                      |
| 10                               | Differential peaks | 0.9508                 | 0.9683                         | 656.8795        | 66.8426                        | 0.6277                  | 0.674                          | 0.8519                     | 0.9238                         | 0.7853                     | 0.8701                         |                                    |                      |
| 20                               | Differential peaks | 0.9805                 | 0.9852                         | 373.5178        | 29.8795                        | 0.7754                  | 0.7892                         | 0.9264                     | 0.9595                         | 0.8939                     | 0.9313                         |                                    |                      |

**Supplementary Table 1: Performance of AtacWorks on bulk ATAC-seq data from human erythroblasts.** ResNet models were trained on bulk ATAC-seq data from CD4<sup>+</sup> T cells, CD8<sup>+</sup> T cells, B cells, and NK cells. Metrics were calculated separately on the whole genome, on chromosome 10 (not used for training), and on differential

peaks (peaks present only in either the training data or the test data). MSE: Mean Squared Error. AUPRC: Area Under the Precision-Recall Curve. AUROC: Area Under the Receiver-Operator Characteristic.

## Supplementary Table 2

| Coverage<br>(x million<br>reads) | Region       | Pearson correlation |                                          |                               | MSE             |                                          |                               | Spearman correlation |                                          |                               |
|----------------------------------|--------------|---------------------|------------------------------------------|-------------------------------|-----------------|------------------------------------------|-------------------------------|----------------------|------------------------------------------|-------------------------------|
|                                  |              | Sub-<br>sampled     | Sub-<br>sampled+<br>linear<br>regression | Sub-<br>sampled+<br>AtacWorks | Sub-<br>sampled | Sub-<br>sampled+<br>linear<br>regression | Sub-<br>sampled+<br>AtacWorks | Sub-<br>sampled      | Sub-<br>sampled+<br>linear<br>regression | Sub-<br>sampled+<br>AtacWorks |
| 0.2                              | Whole genome | 0.2953              | 0.3501                                   | 0.5324                        | 124.4684        | 120.7217                                 | 96.043                        | 0.0987               | 0.1322                                   | 0.1612                        |
| 1                                | Whole genome | 0.5735              | 0.6341                                   | 0.8275                        | 120.5494        | 83.6344                                  | 41.6286                       | 0.2056               | 0.3167                                   | 0.3153                        |
| 5                                | Whole genome | 0.8627              | 0.8672                                   | 0.9478                        | 101.9874        | 32.4167                                  | 13.2582                       | 0.4192               | 0.4395                                   | 0.5441                        |
| 10                               | Whole genome | 0.9374              | 0.9318                                   | 0.9659                        | 81.0098         | 17.0005                                  | 8.2864                        | 0.5655               | 0.5759                                   | 0.6531                        |
| 20                               | Whole genome | 0.9806              | 0.9717                                   | 0.9813                        | 46.3492         | 7.0099                                   | 4.4977                        | 0.747                | 0.7479                                   | 0.7819                        |
| 0.2                              | Chr10        | 0.2929              | 0.338                                    | 0.5446                        | 120.5101        | 116.8217                                 | 90.4098                       | 0.0955               | 0.1223                                   | 0.144                         |
| 1                                | Chr10        | 0.5483              | 0.6064                                   | 0.8205                        | 116.8774        | 85.5822                                  | 40.4792                       | 0.1993               | 0.2798                                   | 0.2793                        |
| 5                                | Chr10        | 0.839               | 0.8563                                   | 0.941                         | 98.9833         | 33.1683                                  | 13.0731                       | 0.4107               | 0.4253                                   | 0.5075                        |
| 10                               | Chr10        | 0.9143              | 0.9208                                   | 0.9623                        | 79.2786         | 17.7044                                  | 8.3869                        | 0.5548               | 0.5622                                   | 0.6251                        |
| 20                               | Chr10        | 0.9661              | 0.9673                                   | 0.9797                        | 45.2997         | 7.1963                                   | 4.5417                        | 0.7381               | 0.7385                                   | 0.7663                        |
| 0.2                              | All peaks    | 0.5001              | 0.5478                                   | 0.5703                        | 5258.5034       | 5099.5127                                | 3449.5449                     | 0.2556               | 0.3374                                   | 0.3176                        |
| 1                                | All peaks    | 0.7941              | 0.8161                                   | 0.854                         | 5090.3765       | 1489.5656                                | 1320.9353                     | 0.4009               | 0.4549                                   | 0.4814                        |
| 5                                | All peaks    | 0.9498              | 0.9529                                   | 0.9632                        | 4294.8691       | 386.7463                                 | 349.4973                      | 0.5557               | 0.5762                                   | 0.615                         |
| 10                               | All peaks    | 0.9765              | 0.9773                                   | 0.9813                        | 3397.5979       | 187.2144                                 | 180.4983                      | 0.6451               | 0.6529                                   | 0.6763                        |
| 20                               | All peaks    | 0.9911              | 0.991                                    | 0.9921                        | 1921.0201       | 74.2914                                  | 73.2704                       | 0.7487               | 0.7487                                   | 0.7567                        |
| 0.2                              | Non-peaks    | 0.0841              | 0.1099                                   | 0.0966                        | 14.1205         | 13.7105                                  | 23.9647                       | 0.0798               | 0.1028                                   | 0.1372                        |
| 1                                | Non-peaks    | 0.19                | 0.2274                                   | 0.2055                        | 13.7308         | 53.416                                   | 14.1319                       | 0.178                | 0.2923                                   | 0.2896                        |
| 5                                | Non-peaks    | 0.4084              | 0.4186                                   | 0.4829                        | 11.868          | 24.801                                   | 6.0313                        | 0.3906               | 0.4106                                   | 0.5209                        |
| 10                               | Non-peaks    | 0.5618              | 0.5612                                   | 0.6133                        | 9.725           | 13.342                                   | 4.585                         | 0.541                | 0.5513                                   | 0.6331                        |
| 20                               | Non-peaks    | 0.743               | 0.7361                                   | 0.763                         | 6.0561          | 5.5637                                   | 3.0196                        | 0.7312               | 0.732                                    | 0.7682                        |

**Supplementary Table 2: Comparison of AtacWorks and linear regression.** Comparison of AtacWorks and linear regression models on bulk ATAC-seq data from human erythroblasts. The ResNet models in Supplementary Table 1 are compared against linear regression models for denoising, trained on the same data. MSE: Mean Squared Error.

### Supplementary Table 3

| Coverage<br>(x million<br>reads) | Region       | Pearson correlation |                                            |                                             | MSE             |                                            |                                             | Spearman correlation |                                            |                                             | AUPRC                             |                                            |                                             | AUROC                     |                                            |                                             |
|----------------------------------|--------------|---------------------|--------------------------------------------|---------------------------------------------|-----------------|--------------------------------------------|---------------------------------------------|----------------------|--------------------------------------------|---------------------------------------------|-----------------------------------|--------------------------------------------|---------------------------------------------|---------------------------|--------------------------------------------|---------------------------------------------|
|                                  |              | Sub-<br>sampled     | Sub-<br>sampled<br>+AW<br>(1 cell<br>type) | Sub-<br>Sampled<br>+AW<br>(4 cell<br>types) | Sub-<br>sampled | Sub-<br>Sampled<br>+AW<br>(1 cell<br>type) | Sub-<br>Sampled<br>+AW<br>(4 cell<br>types) | Sub-<br>sampled      | Sub-<br>Sampled<br>+AW<br>(1 cell<br>type) | Sub-<br>Sampled<br>+AW<br>(4 cell<br>types) | Sub-<br>Sampled<br>+AW<br>+ MACS2 | Sub-<br>Sampled<br>+AW<br>(1 cell<br>type) | Sub-<br>Sampled<br>+AW<br>(4 cell<br>types) | Sub-<br>sampled<br>+MACS2 | Sub-<br>sampled<br>+AW<br>(1 cell<br>type) | Sub-<br>sampled<br>+AW<br>(4 cell<br>types) |
| 0.2                              | Whole genome | 0.2953              | 0.5241                                     | 0.5324                                      | 124.4684        | 108.6078                                   | 96.043                                      | 0.0987               | 0.1534                                     | 0.1612                                      | 0.0347                            | 0.1351                                     | 0.1398                                      | 0.5322                    | 0.6704                                     | 0.6764                                      |
| 1                                | Whole genome | 0.5735              | 0.8265                                     | 0.8275                                      | 120.5494        | 42.6534                                    | 41.6286                                     | 0.2056               | 0.2976                                     | 0.3153                                      | 0.0977                            | 0.3076                                     | 0.311                                       | 0.5879                    | 0.8107                                     | 0.8167                                      |
| 5                                | Whole genome | 0.8627              | 0.9458                                     | 0.9478                                      | 101.9874        | 14.2922                                    | 13.2582                                     | 0.4192               | 0.5366                                     | 0.5441                                      | 0.2782                            | 0.4951                                     | 0.5048                                      | 0.7513                    | 0.9124                                     | 0.9173                                      |
| 10                               | Whole genome | 0.9374              | 0.9654                                     | 0.9659                                      | 81.0098         | 8.3982                                     | 8.2864                                      | 0.5655               | 0.6482                                     | 0.6531                                      | 0.4114                            | 0.6038                                     | 0.6055                                      | 0.8639                    | 0.9508                                     | 0.9524                                      |
| 20                               | Whole genome | 0.9806              | 0.9813                                     | 0.9813                                      | 46.3492         | 4.5704                                     | 4.4977                                      | 0.747                | 0.779                                      | 0.7819                                      | 0.5856                            | 0.7335                                     | 0.7356                                      | 0.9545                    | 0.9789                                     | 0.9789                                      |
| 0.2                              | Chr10        | 0.2929              | 0.5317                                     | 0.5446                                      | 120.5101        | 102.9197                                   | 90.4098                                     | 0.0955               | 0.1384                                     | 0.144                                       | 0.0328                            | 0.1299                                     | 0.1339                                      | 0.5175                    | 0.6667                                     | 0.6717                                      |
| 1                                | Chr10        | 0.5483              | 0.8177                                     | 0.8205                                      | 116.8774        | 41.535                                     | 40.4792                                     | 0.1993               | 0.2663                                     | 0.2793                                      | 0.0885                            | 0.2852                                     | 0.2883                                      | 0.5708                    | 0.7965                                     | 0.8023                                      |
| 5                                | Chr10        | 0.839               | 0.9386                                     | 0.941                                       | 98.9833         | 13.9441                                    | 13.0731                                     | 0.4107               | 0.501                                      | 0.5075                                      | 0.2673                            | 0.475                                      | 0.4833                                      | 0.7406                    | 0.9075                                     | 0.9121                                      |
| 10                               | Chr10        | 0.9143              | 0.9609                                     | 0.9623                                      | 79.2786         | 8.5287                                     | 8.3869                                      | 0.5548               | 0.6196                                     | 0.6251                                      | 0.3962                            | 0.5838                                     | 0.5852                                      | 0.8556                    | 0.9468                                     | 0.9486                                      |
| 20                               | Chr10        | 0.9661              | 0.9791                                     | 0.9797                                      | 45.2997         | 4.6037                                     | 4.5417                                      | 0.7381               | 0.7632                                     | 0.7663                                      | 0.5674                            | 0.7172                                     | 0.7191                                      | 0.9503                    | 0.977                                      | 0.9771                                      |
| 0.2                              | All peaks    | 0.5001              | 0.5694                                     | 0.5703                                      | 5258.5034       | 3677.3535                                  | 3449.5449                                   | 0.2556               | 0.3227                                     | 0.3176                                      |                                   |                                            |                                             |                           |                                            |                                             |
| 1                                | All peaks    | 0.7941              | 0.8519                                     | 0.854                                       | 5090.3765       | 1352.3778                                  | 1320.9353                                   | 0.4009               | 0.4782                                     | 0.4814                                      |                                   |                                            |                                             |                           |                                            |                                             |
| 5                                | All peaks    | 0.9498              | 0.9621                                     | 0.9632                                      | 4294.8691       | 366.5408                                   | 349.4973                                    | 0.5557               | 0.6081                                     | 0.615                                       |                                   |                                            |                                             |                           |                                            |                                             |
| 10                               | All peaks    | 0.9765              | 0.9807                                     | 0.9813                                      | 3397.5979       | 181.6377                                   | 180.4983                                    | 0.6451               | 0.6724                                     | 0.6763                                      |                                   |                                            |                                             |                           |                                            |                                             |
| 20                               | All peaks    | 0.9911              | 0.9919                                     | 0.9921                                      | 1921.0201       | 75.5221                                    | 73.2704                                     | 0.7487               | 0.7543                                     | 0.7567                                      |                                   |                                            |                                             |                           |                                            |                                             |
| 0.2                              | Non-peaks    | 0.0841              | 0.0865                                     | 0.0966                                      | 14.1205         | 31.9033                                    | 23.9647                                     | 0.0798               | 0.1284                                     | 0.1372                                      |                                   |                                            |                                             |                           |                                            |                                             |
| 1                                | Non-peaks    | 0.19                | 0.2028                                     | 0.2055                                      | 13.7308         | 14.503                                     | 14.1319                                     | 0.178                | 0.271                                      | 0.2896                                      |                                   |                                            |                                             |                           |                                            |                                             |
| 5                                | Non-peaks    | 0.4084              | 0.4699                                     | 0.4829                                      | 11.868          | 6.7211                                     | 6.0313                                      | 0.3906               | 0.5132                                     | 0.5209                                      |                                   |                                            |                                             |                           |                                            |                                             |
| 10                               | Non-peaks    | 0.5618              | 0.6112                                     | 0.6133                                      | 9.725           | 4.6747                                     | 4.585                                       | 0.541                | 0.6281                                     | 0.6331                                      |                                   |                                            |                                             |                           |                                            |                                             |
| 20                               | Non-peaks    | 0.743               | 0.7542                                     | 0.763                                       | 6.0561          | 3.0454                                     | 3.0196                                      | 0.7312               | 0.765                                      | 0.7682                                      |                                   |                                            |                                             |                           |                                            |                                             |

**Supplementary Table 3: Performance of AtacWorks on bulk ATAC-seq data from human erythroblasts using different training datasets.** ResNet models trained on bulk ATAC-seq data from 4 cell types (Supplementary Table 1) are compared against ResNet models trained on bulk ATAC-seq data from 1 cell type (CD4<sup>+</sup> T cells). MSE: Mean Squared Error. AUPRC: Area Under the Precision-Recall Curve. AUROC: Area Under the Receiver-Operator Characteristic. AW: AtacWorks.

## Supplementary Table 4

| Coverage<br>(x million<br>reads) | Region          | Pearson correlation |                                                      |                                                 | MSE             |                                                   |                                                 | AUPRC                     |                                                   |                                                 | AUROC                     |                                                   |                                                 |
|----------------------------------|-----------------|---------------------|------------------------------------------------------|-------------------------------------------------|-----------------|---------------------------------------------------|-------------------------------------------------|---------------------------|---------------------------------------------------|-------------------------------------------------|---------------------------|---------------------------------------------------|-------------------------------------------------|
|                                  |                 | Sub-<br>sampled     | Sub-<br>sampled+<br>AW<br>(4 blood<br>cell<br>types) | Sub-<br>sampled<br>+AW<br>(ENCODE<br>3 tissues) | Sub-<br>sampled | Sub-<br>Sampled<br>+AW<br>(4 blood<br>cell types) | Sub-<br>sampled+<br>AW<br>(ENCODE<br>3 tissues) | Sub-<br>sampled<br>+MACS2 | Sub-<br>Sampled<br>+AW<br>(4 blood<br>cell types) | Sub-<br>Sampled<br>+AW<br>(ENCODE<br>3 tissues) | Sub-<br>sampled+<br>MACS2 | Sub-<br>Sampled<br>+AW<br>(4 blood<br>cell types) | Sub-<br>sampled<br>+AW<br>(ENCODE 3<br>tissues) |
| 0.2                              | Whole<br>genome | 0.1886              | 0.5159                                               | 0.5996                                          | 42.1937         | 38.8961                                           | 29.5009                                         | 0.0179                    | 0.0486                                            | 0.049                                           | 0.5216                    | 0.6317                                            | 0.6322                                          |
| 1                                | Whole<br>genome | 0.3573              | 0.7012                                               | 0.7501                                          | 40.9502         | 23.2419                                           | 19.2466                                         | 0.0396                    | 0.1659                                            | 0.1803                                          | 0.5634                    | 0.7875                                            | 0.7908                                          |
| 5                                | Whole<br>genome | 0.6623              | 0.8697                                               | 0.8683                                          | 34.8418         | 8.9874                                            | 8.4242                                          | 0.177                     | 0.4269                                            | 0.4412                                          | 0.7318                    | 0.9123                                            | 0.9153                                          |
| 10                               | Whole<br>genome | 0.7943              | 0.9075                                               | 0.909                                           | 27.9176         | 6.1835                                            | 5.9574                                          | 0.3077                    | 0.5526                                            | 0.5692                                          | 0.8521                    | 0.952                                             | 0.9539                                          |
| 20                               | Whole<br>genome | 0.9061              | 0.9445                                               | 0.944                                           | 16.3667         | 3.7409                                            | 3.6545                                          | 0.5058                    | 0.707                                             | 0.7137                                          | 0.9488                    | 0.9808                                            | 0.9811                                          |
| 0.2                              | Chr10           | 0.1136              | 0.1689                                               | 0.1743                                          | 28.063          | 40.482                                            | 25.7791                                         | 0.0188                    | 0.0439                                            | 0.0446                                          | 0.5095                    | 0.602                                             | 0.6024                                          |
| 1                                | Chr10           | 0.2424              | 0.3891                                               | 0.4112                                          | 27.2533         | 25.2848                                           | 19.5273                                         | 0.0366                    | 0.1409                                            | 0.1536                                          | 0.5491                    | 0.7571                                            | 0.7591                                          |
| 5                                | Chr10           | 0.505               | 0.6858                                               | 0.6942                                          | 23.3745         | 9.6798                                            | 8.7078                                          | 0.1658                    | 0.3932                                            | 0.4071                                          | 0.7192                    | 0.8935                                            | 0.8968                                          |
| 10                               | Chr10           | 0.6605              | 0.778                                                | 0.7843                                          | 18.9262         | 6.7641                                            | 6.2687                                          | 0.2955                    | 0.5164                                            | 0.5318                                          | 0.8405                    | 0.9403                                            | 0.9424                                          |
| 20                               | Chr10           | 0.8215              | 0.8679                                               | 0.8697                                          | 11.4164         | 4.1109                                            | 3.9582                                          | 0.4825                    | 0.6726                                            | 0.6798                                          | 0.9411                    | 0.9756                                            | 0.9763                                          |

**Supplementary Table 4: Performance of AtacWorks on ENCODE bulk ATAC-seq data from the human Peyer's Patch.** The ResNet models in Supplementary Table 1 are compared against ResNet models trained on data from three human tissue samples (coronary artery, tibial nerve, and left ventricle) sequenced as part of the ENCODE project. MSE: Mean Squared Error. AUPRC: Area Under the Precision-Recall Curve. AUROC: Area Under the Receiver-Operator Characteristic. AW: AtacWorks.



Supplementary Table 5

| Donor/replicate                   | # of reads        | Visual TSS score |
|-----------------------------------|-------------------|------------------|
| 6792-7A                           | 8,885,084         | 10               |
| 6792-7B                           | 9,399,272         | 12               |
| <b>Mono-7.low_qual.bam</b>        | <b>18,284,356</b> | <b>11</b>        |
| 4983-7A                           | 8,426,328         | 14               |
| 4983-7B                           | 6,672,448         | 20               |
| Donor7256-7A-141106               | 16,498,592        | 15               |
| Donor7256-7B-141106               | 19,930,272        | 14               |
| <b>Mono-7.high_qual.bam</b>       | <b>51,527,640</b> | <b>16</b>        |
| Donor2596-Erythroblast-15A-150303 | 14,444,098        | 5                |
| Donor2596-Erythroblast-15B-150303 | 6,414,806         | 8                |
| <b>Erythro-15.low_qual.bam</b>    | <b>20,858,904</b> | <b>6</b>         |
| Donor2596-Erythroblast-15C-150303 | 17,261,154        | 10               |
| Donor5483-Erythroblast-15A-150305 | 3,271,174         | 20               |
| Donor5483-Erythroblast-15B-150305 | 1,775,816         | 19               |
| Donor5483-Erythroblast-15C-150305 | 3,534,964         | 10               |
| Donor6926-Erythroblast-15A-150318 | 3,534,964         | 20               |
| Donor6926-Erythroblast-15B-150318 | 4,806,218         | 19               |
| <b>Erythro-15.high_qual.bam</b>   | <b>34,184,290</b> | <b>13</b>        |

**Supplementary Table 5: Aggregation of bulk ATAC-seq tracks by quality.** Breakdown of how human monocyte and erythroblast ATAC-seq tracks were aggregated across donors and replicates to create paired high and low quality training data.

## Supplementary Table 6

| Region       | Pearson correlation |                         | MSE         |                         | Spearman correlation |                         | AUPRC               |                         | AUROC               |                         |
|--------------|---------------------|-------------------------|-------------|-------------------------|----------------------|-------------------------|---------------------|-------------------------|---------------------|-------------------------|
|              | Low quality         | Low quality + AtacWorks | Low quality | Low quality + AtacWorks | Low quality          | Low quality + AtacWorks | Low quality + MACS2 | Low quality + AtacWorks | Low quality + MACS2 | Low quality + AtacWorks |
| Whole genome | 0.7056              | 0.8952                  | 18.874      | 11.3718                 | 0.2654               | 0.3307                  | 0.4121              | 0.2684                  | 0.8747              | 0.8096                  |
| Chr10        | 0.6891              | 0.9066                  | 18.2168     | 10.5776                 | 0.2361               | 0.282                   | 0.2407              | 0.3816                  | 0.7892              | 0.8573                  |
| All peaks    | 0.9114              | 0.9212                  | 967.2128    | 601.3749                | 0.6048               | 0.6492                  |                     |                         |                     |                         |
| Non-peaks    | 0.224               | 0.2202                  | 3.7774      | 1.9796                  | 0.2414               | 0.3028                  |                     |                         |                     |                         |

**Supplementary Table 6: Performance of AtacWorks on low-quality bulk ATAC-seq signal from human erythroblasts.** A ResNet model was trained on paired low- and high-quality ATAC-seq data from human monocytes. MSE: Mean Squared Error. AUPRC: Area Under the Precision-Recall Curve. AUROC: Area Under the Receiver-Operator Characteristic.

Supplementary Table 7

|                                 | Coverage<br>(x million reads)   | 1            | 1        | 1         | 1         |
|---------------------------------|---------------------------------|--------------|----------|-----------|-----------|
| Region                          |                                 | Whole genome | Chr10    | All peaks | Non-peaks |
| <b>Pearson<br/>Correlation</b>  | Subsampled                      | 0.5735       | 0.5483   | 0.7941    | 0.19      |
|                                 | Subsampled+<br>AtacWorks resnet | 0.8265       | 0.8177   | 0.8519    | 0.2028    |
|                                 | Subsampled+<br>PillowNet U-net  | 0.7825       | 0.7728   | 0.8338    | 0.1936    |
|                                 | Subsampled + U-net 2            | 0.7784       | 0.7716   | 0.8375    | 0.1046    |
| <b>MSE</b>                      | Subsampled                      | 120.5494     | 116.8774 | 5090.3765 | 13.7308   |
|                                 | Subsampled+<br>AtacWorks resnet | 42.6534      | 41.535   | 1352.3778 | 14.503    |
|                                 | Subsampled+<br>PillowNet U-net  | 44.8554      | 44.36    | 1446.2043 | 14.7357   |
|                                 | Subsampled + U-net 2            | 119.8178     | 116.2994 | 5038.1045 | 14.107    |
| <b>Spearman<br/>Correlation</b> | Subsampled                      | 0.2056       | 0.1993   | 0.4009    | 0.178     |
|                                 | Subsampled+<br>AtacWorks resnet | 0.2976       | 0.2663   | 0.4782    | 0.271     |
|                                 | Subsampled+<br>PillowNet U-net  | 0.233        | 0.218    | 0.4634    | 0.2003    |
|                                 | Subsampled + U-net 2            | 0.1381       | 0.1336   | 0.465     | 0.0934    |
| <b>AUPRC</b>                    | Subsampled                      | 0.0977       | 0.0885   |           |           |
|                                 | Subsampled+<br>AtacWorks resnet | 0.3076       | 0.2852   |           |           |
|                                 | Subsampled+<br>PillowNet U-net  | 0.1272       | 0.1181   |           |           |
|                                 | Subsampled + U-net 2            | 0.1919       | 0.1726   |           |           |
| <b>AUROC</b>                    | Subsampled                      | 0.5879       | 0.5708   |           |           |
|                                 | Subsampled+<br>AtacWorks resnet | 0.8107       | 0.7965   |           |           |
|                                 | Subsampled+<br>PillowNet U-net  | 0.7243       | 0.7428   |           |           |
|                                 | Subsampled + U-net 2            | 0.7783       | 0.7623   |           |           |

**Supplementary Table 7: Comparison of AtacWorks and U-Net on bulk ATAC-seq data from erythroblasts.** ResNet models are compared against a previously-described U-Net model architecture<sup>1</sup>, as well as an independently developed U-Net architecture. All models were trained on bulk ATAC-seq data from human CD4<sup>+</sup> T cells. MSE: Mean Squared Error. AUPRC: Area Under the Precision-Recall Curve. AUROC: Area Under the Receiver-Operator Characteristic.

## Supplementary Table 8

| Cells | Approx coverage (x million reads) | Region       | Pearson correlation |                 | MSE         |                 | Spearman correlation |                 | AUPRC              |                 | AUROC              |                 | Equivalent #cells            |                |
|-------|-----------------------------------|--------------|---------------------|-----------------|-------------|-----------------|----------------------|-----------------|--------------------|-----------------|--------------------|-----------------|------------------------------|----------------|
|       |                                   |              | Sub-sampled         | Sub-sampled +AW | Sub-sampled | Sub-sampled +AW | Sub-sampled          | Sub-sampled +AW | Sub-sampled +MACS2 | Sub-sampled +AW | Sub-sampled +MACS2 | Sub-sampled +AW | Based on Pearson correlation | Based on AUPRC |
| 5     | 0.1                               | Whole genome | 0.6922              | 0.7617          | 1291.1573   | 547.6562        | 0.1411               | 0.2596          | 0.0361             | 0.3983          | 0.5438             | 0.7563          | 9                            | 128            |
| 10    | 0.2                               | Whole genome | 0.7783              | 0.8002          | 1285.0303   | 465.422         | 0.1872               | 0.2333          | 0.0649             | 0.4895          | 0.5718             | 0.8139          | 12                           | 183            |
| 50    | 1                                 | Whole genome | 0.9328              | 0.9496          | 1246.7446   | 128.0476        | 0.287                | 0.3631          | 0.2048             | 0.7008          | 0.6561             | 0.9292          | 67                           | 406            |
| 5     | 0.1                               | Chr10        | 0.6589              | 0.7427          | 981.3273    | 448.0301        | 0.1347               | 0.238           | 0.0363             | 0.3694          | 0.5238             | 0.7423          |                              |                |
| 10    | 0.2                               | Chr10        | 0.7513              | 0.7779          | 976.6679    | 389.8831        | 0.1779               | 0.2218          | 0.0601             | 0.4587          | 0.5615             | 0.799           |                              |                |
| 50    | 1                                 | Chr10        | 0.9244              | 0.9459          | 947.8414    | 104.3384        | 0.2793               | 0.3387          | 0.2107             | 0.6748          | 0.6402             | 0.9191          |                              |                |
| 5     | 0.1                               | All peaks    | 0.686               | 0.7346          | 68151.6953  | 28093.5059      | 0.4292               | 0.4685          |                    |                 |                    |                 |                              |                |
| 10    | 0.2                               | All peaks    | 0.7665              | 0.7776          | 67828.3047  | 24047.6816      | 0.5088               | 0.5304          |                    |                 |                    |                 |                              |                |
| 50    | 1                                 | All peaks    | 0.9288              | 0.9418          | 65807.0625  | 6643.3594       | 0.6751               | 0.7119          |                    |                 |                    |                 |                              |                |
| 5     | 0.1                               | Non-peaks    | 0.0687              | 0.1558          | 1.1033      | 16.1673         | 0.0634               | 0.1723          |                    |                 |                    |                 |                              |                |
| 10    | 0.2                               | Non-peaks    | 0.1103              | 0.1187          | 1.0976      | 10.4094         | 0.0907               | 0.1181          |                    |                 |                    |                 |                              |                |
| 50    | 1                                 | Non-peaks    | 0.2059              | 0.3245          | 1.0726      | 2.3366          | 0.1751               | 0.2753          |                    |                 |                    |                 |                              |                |

**Supplementary Table 8: Performance of AtacWorks on dscATAC data from human NK cells.** ResNet models were trained on dscATAC data from human B cells and monocytes. MSE: Mean Squared Error. AUPRC: Area Under the Precision-Recall Curve. AUROC: Area Under the Receiver-Operator Characteristic. dscATAC: Droplet Single-Cell ATAC-seq. NK: Natural Killer. AW: AtacWorks.

## Supplementary Table 9

| Barcode                | Coverage (reads) | Region       | Pearson correlation |                 | MSE         |                 | Spearman correlation |                 | AUPRC              |                 | AUROC              |                 | Equivalent # cells           |                |
|------------------------|------------------|--------------|---------------------|-----------------|-------------|-----------------|----------------------|-----------------|--------------------|-----------------|--------------------|-----------------|------------------------------|----------------|
|                        |                  |              | Sub-sampled         | Sub-sampled +AW | Sub-sampled | Sub-sampled +AW | Sub-sampled          | Sub-sampled +AW | Sub-sampled +MACS2 | Sub-sampled +AW | Sub-sampled +MACS2 | Sub-sampled +AW | Based on Pearson correlation | Based on AUPRC |
| aattggaggt<br>tagaaata | 20012            | Whole genome | 0.4008              | 0.479           | 1296.5016   | 998.5561        | 0.0754               | 0.1712          | 0.0202             | 0.1804          | 0.5228             | 0.612           | 1-2                          | 21             |
| ctaggtcacc<br>actgcggt | 19990            | Whole genome | 0.3951              | 0.4679          | 1296.4674   | 1011.2458       | 0.0738               | 0.1704          | 0.0206             | 0.1769          | 0.5183             | 0.6137          | 1-2                          | 21             |
| gtacaggat<br>caaatccgg | 19988            | Whole genome | 0.3904              | 0.4687          | 1296.5342   | 1009.9517       | 0.0761               | 0.1752          | 0.0202             | 0.1874          | 0.5206             | 0.6178          | 1-2                          | 23             |
| gtggtgggg<br>atctgtgta | 19984            | Whole genome | 0.3522              | 0.4196          | 1296.5994   | 1073.1012       | 0.0724               | 0.1743          | 0.0212             | 0.1685          | 0.5194             | 0.6127          | 1-2                          | 20             |
| aattggaggt<br>tagaaata | 20012            | Chr10        | 0.3591              | 0.432           | 985.4442    | 802.4686        | 0.0708               | 0.148           | 0.0187             | 0.1458          | 0.5031             | 0.5946          |                              |                |
| ctaggtcacc<br>actgcggt | 19990            | Chr10        | 0.3609              | 0.4324          | 985.3823    | 804.9632        | 0.0662               | 0.1466          | 0.0221             | 0.1386          | 0.525              | 0.5923          |                              |                |
| gtacaggat<br>caaatccgg | 19988            | Chr10        | 0.3941              | 0.47            | 985.2795    | 767.851         | 0.0746               | 0.1684          | 0.0229             | 0.1947          | 0.5108             | 0.6222          |                              |                |
| gtggtgggg<br>atctgtgta | 19984            | Chr10        | 0.354               | 0.4161          | 985.4137    | 826.1671        | 0.0661               | 0.1576          | 0.0211             | 0.147           | 0.4948             | 0.5977          |                              |                |
| aattggaggt<br>tagaaata | 20012            | All peaks    | 0.3922              | 0.4447          | 68433.8594  | 51679.5508      | 0.2429               | 0.2551          |                    |                 |                    |                 |                              |                |
| ctaggtcacc<br>actgcggt | 19990            | All peaks    | 0.3911              | 0.4369          | 68432.0547  | 51895.7461      | 0.2369               | 0.2474          |                    |                 |                    |                 |                              |                |
| gtacaggat<br>caaatccgg | 19988            | All peaks    | 0.3777              | 0.4293          | 68435.5781  | 52237.9648      | 0.2408               | 0.2562          |                    |                 |                    |                 |                              |                |
| gtggtgggg<br>atctgtgta | 19984            | All peaks    | 0.3488              | 0.3905          | 68439.0391  | 54451.7227      | 0.2223               | 0.2337          |                    |                 |                    |                 |                              |                |
| aattggaggt<br>tagaaata | 20012            | Non-peaks    | 0.0331              | 0.094           | 1.1065      | 20.6814         | 0.0292               | 0.1094          |                    |                 |                    |                 |                              |                |
| ctaggtcacc<br>actgcggt | 19990            | Non-peaks    | 0.0333              | 0.0855          | 1.1064      | 29.4447         | 0.0308               | 0.1091          |                    |                 |                    |                 |                              |                |
| gtacaggat<br>caaatccgg | 19988            | Non-peaks    | 0.0326              | 0.0957          | 1.1065      | 21.5226         | 0.0296               | 0.1119          |                    |                 |                    |                 |                              |                |
| gtggtgggg<br>atctgtgta | 19984            | Non-peaks    | 0.0373              | 0.0862          | 1.1061      | 43.1767         | 0.0326               | 0.1149          |                    |                 |                    |                 |                              |                |

**Supplementary Table 9: Performance of AtacWorks on denoising and peak calling from single cells.** A ResNet model was trained on droplet single-cell ATAC-seq (dscATAC) data from human B cells and monocytes, and was applied to 4 different human natural killer (NK) cells. MSE: Mean Squared Error. AUPRC: Area Under the Precision-Recall Curve. AUROC: Area Under the Receiver-Operator Characteristic. AW: AtacWorks.

## Supplementary Table 10

| Cells | Approx coverage (x million reads) | Region       | Pearson correlation |                        | MSE         |                        | Spearman correlation |                        | AUPRC              |                        | AUROC              |                        |
|-------|-----------------------------------|--------------|---------------------|------------------------|-------------|------------------------|----------------------|------------------------|--------------------|------------------------|--------------------|------------------------|
|       |                                   |              | Sub-sampled         | Sub-sampled+ AtacWorks | Sub-sampled | Sub-sampled+ AtacWorks | Sub-sampled          | Sub-sampled+ AtacWorks | Sub-sampled +MACS2 | Sub-sampled+ AtacWorks | Sub-sampled +MACS2 | Sub-sampled+ AtacWorks |
| 450   | 1                                 | Whole genome | 0.972               | 0.9737                 | 2801.6499   | 152.76                 | 0.3347               | 0.3896                 | 0.3161             | 0.7552                 | 0.7033             | 0.9451                 |
| 450   | 1                                 | Chr10        | 0.967               | 0.969                  | 2150.2637   | 137.6873               | 0.3222               | 0.3608                 | 0.3026             | 0.7409                 | 0.6862             | 0.9418                 |
| 450   | 1                                 | All peaks    | 0.9694              | 0.9699                 | 198294.5469 | 10640.4434             | 0.744                | 0.7394                 |                    |                        |                    |                        |
| 450   | 1                                 | Non-peaks    | 0.2274              | 0.3857                 | 0.543       | 2.4879                 | 0.1844               | 0.2912                 |                    |                        |                    |                        |

**Supplementary Table 10: Performance of AtacWorks on dsciATAC data from human CD4<sup>+</sup> T cells.** The ResNet model used was trained on groups of 50 human blood cells sequenced using the droplet single-cell ATAC-seq (dscATAC) protocol. dsciATAC: Droplet-based Single-cell Combinatorial Indexing ATAC-seq.

Supplementary Table 11

|                             | Number of Cells                      | 35           | 35      | 35        | 35        |
|-----------------------------|--------------------------------------|--------------|---------|-----------|-----------|
|                             | Approx coverage (x million reads)    | 1            | 1       | 1         | 1         |
| Region                      |                                      | Whole genome | Chr10   | All peaks | Non-peaks |
| <b>Pearson correlation</b>  | Subsampled                           | 0.8801       | 0.8511  | 0.8869    | 0.3026    |
|                             | Subsampled + AtacWorks (dscATAC-seq) | 0.917        | 0.8947  | 0.9015    | 0.3197    |
|                             | Subsampled +AtacWorks (sciATAC-seq)  | 0.9271       | 0.8987  | 0.9134    | 0.3697    |
| <b>MSE</b>                  | Subsampled                           | 96.7348      | 74.4388 | 4267.9238 | 0.9885    |
|                             | Subsampled +AtacWorks (dscATAC-seq)  | 70.9418      | 54.1613 | 3120.0884 | 0.9511    |
|                             | Subsampled +AtacWorks (sciATAC-seq)  | 15.8201      | 16.0614 | 639.1514  | 1.512     |
| <b>Spearman correlation</b> | Subsampled                           | 0.3609       | 0.3655  | 0.6488    | 0.2724    |
|                             | Subsampled +AtacWorks (dscATAC-seq)  | 0.3815       | 0.3884  | 0.6668    | 0.2708    |
|                             | Subsampled +AtacWorks (sciATAC-seq)  | 0.3761       | 0.3806  | 0.6638    | 0.2832    |
| <b>AUPRC</b>                | Subsampled + MACS2                   | 0.3391       | 0.3404  |           |           |
|                             | Subsampled +AtacWorks (dscATAC-seq)  | 0.7332       | 0.7332  |           |           |
|                             | Subsampled +AtacWorks (sciATAC-seq)  | 0.7483       | 0.7556  |           |           |
| <b>AUROC</b>                | Subsampled + MACS2                   | 0.7159       | 0.7167  |           |           |
|                             | Subsampled +AtacWorks (dscATAC-seq)  | 0.9555       | 0.9555  |           |           |
|                             | Subsampled +AtacWorks (sciATAC-seq)  | 0.9604       | 0.9614  |           |           |

**Supplementary Table 11: Performance of AtacWorks on sciATAC data from macrophages in a mouse lung tumor sample.** A ResNet model trained on groups of 50 human blood cells sequenced using the droplet single-cell ATAC-seq (dscATAC) protocol is compared against a model trained on mouse B cells and Monocytes in the same sciATAC dataset. MSE: Mean Squared Error. AUPRC: Area Under the Precision-Recall Curve. AUROC: Area Under the Receiver-Operator Characteristic. sciATAC: Single-cell Combinatorial Indexing ATAC-seq.

## Supplementary Table 12

| Coverage<br>(x million<br>reads) | Region                            | Pearson correlation |                               | MSE             |                               | Spearman correlation |                               |
|----------------------------------|-----------------------------------|---------------------|-------------------------------|-----------------|-------------------------------|----------------------|-------------------------------|
|                                  |                                   | Sub-<br>sampled     | Sub-<br>sampled+<br>AtacWorks | Sub-<br>sampled | Sub-<br>sampled+<br>AtacWorks | Sub-<br>sampled      | Sub-<br>sampled+<br>AtacWorks |
| 1                                | CTCF Motif regions - Whole genome | 0.5346              | 0.7199                        | 86.0941         | 41.0938                       | 0.2573               | 0.4703                        |
| 5                                | CTCF Motif regions - Whole genome | 0.8198              | 0.8764                        | 79.3968         | 19.5325                       | 0.4742               | 0.6046                        |
| 10                               | CTCF Motif regions - Whole genome | 0.9018              | 0.9192                        | 71.3574         | 13.0298                       | 0.5851               | 0.6696                        |
| 20                               | CTCF Motif regions - Whole genome | 0.9524              | 0.9604                        | 56.628          | 8.4881                        | 0.7004               | 0.7269                        |
| 1                                | CTCF Motif regions - Chr10        | 0.5186              | 0.7187                        | 75.9466         | 36.1097                       | 0.2561               | 0.4865                        |
| 5                                | CTCF Motif regions - Chr10        | 0.8108              | 0.8839                        | 69.9755         | 16.1752                       | 0.4719               | 0.6213                        |
| 10                               | CTCF Motif regions - Chr10        | 0.8941              | 0.9306                        | 62.9949         | 9.8819                        | 0.5838               | 0.6889                        |
| 20                               | CTCF Motif regions - Chr10        | 0.9492              | 0.9616                        | 49.8286         | 5.5942                        | 0.6986               | 0.7486                        |

**Supplementary Table 12: Performance of AtacWorks at CTCF binding sites.** The performance of AtacWorks was measured at CTCF binding sites in high-resolution bulk ATAC-seq data from hematopoietic stem cells (HSCs). ResNet models were trained using high-resolution bulk ATAC-seq data from multipotent progenitor (MPP) cells, CD8+ T cells, and NK cells. Both the training and test set were limited to 200-bp regions surrounding CTCF motifs.



## Supplementary Table 13

| full_name                                | name    | variability | bootstrap_lower_bound | bootstrap_upper_bound | p_value  | p_value_adj         |
|------------------------------------------|---------|-------------|-----------------------|-----------------------|----------|---------------------|
| <b>Long-term HSCs</b>                    |         |             |                       |                       |          |                     |
| ENSG00000185697_LINE2<br>870_MYBL1_D_N1  | MYBL1   | 1.067342746 | 0.9791370197          | 1.157565799           | 2.40E-21 | 2.67E-18            |
| ENSG00000101216_LINE3<br>292_GMEB2_D_N1  | GMEB2   | 1.067164574 | 0.6189915519          | 1.351010569           | 3.04E-21 | 2.67E-18            |
| ENSG00000101057_LINE2<br>838_MYBL2_D_N1  | MYBL2   | 1.058762737 | 1.00184957            | 1.114064289           | 9.72E-17 | 5.70E-14            |
| ENSG00000197576_LINE1<br>6121_HOXA4_I_N1 | HOXA4   | 1.039082223 | 0.9826564613          | 1.095651818           | 2.02E-08 | 8.88E-06            |
| ENSG00000101412_LINE1<br>750_E2F1_D_N1   | E2F1    | 1.03851618  | 0.8014084025          | 1.229382582           | 3.15E-08 | 1.11E-05            |
| ENSG00000124664_LINE1<br>834_SPDEF_D_N2  | SPDEF   | 1.028839055 | 0.8297630601          | 1.219492347           | 2.47E-05 | 0.0072456194<br>49  |
| <b>Lymphoid-primed HSCs</b>              |         |             |                       |                       |          |                     |
| ENSG00000101412_LINE1<br>749_E2F1_D_N1   | E2F1    | 1.342320427 | 0                     | 1.893766984           | 0        | 0                   |
| ENSG00000214717_LINE3<br>702_ZBED1_D     | ZBED1   | 1.145643841 | 0.9578956753          | 1.29824065            | 2.54E-90 | 2.24E-87            |
| ENSG00000169953_LINE2<br>711_HSFY2_D_N1  | HSFY2   | 1.100473495 | 0.8613554596          | 1.306172853           | 1.16E-44 | 6.81E-42            |
| ENSG00000169953_LINE2<br>710_HSFY2_D_N2  | HSFY2   | 1.078623847 | 0.7330218719          | 1.318083244           | 2.65E-28 | 9.34E-26            |
| ENSG00000172468_LINE2<br>715_HSFY1_I     | HSFY1   | 1.078623847 | 0.7330218719          | 1.318083244           | 2.65E-28 | 9.34E-26            |
| ENSG00000101057_LINE2<br>836_MYBL2_D_N1  | MYBL2   | 1.047042805 | 0.9146271082          | 1.162710284           | 2.08E-11 | 6.12E-09            |
| ENSG00000139515_LINE2<br>371_PDX1_D_N2   | PDX1    | 1.031957017 | 1.005817911           | 1.055337692           | 3.49E-06 | 0.0008778262<br>953 |
| ENSG00000185697_LINE2<br>871_MYBL1_D_N1  | MYBL1   | 1.028741457 | 0.9215863123          | 1.12120042            | 2.62E-05 | 0.0057674170<br>33  |
| <b>Erythroid-primed HSCs</b>             |         |             |                       |                       |          |                     |
| ENSG00000171532_LINE2<br>64_NEUROD2_D    | NEUROD2 | 1.308414561 | 0.3020714671          | 1.833942362           | 0        | 0                   |
| ENSG00000170370_LINE2<br>476_EMX2_D_N1   | EMX2    | 1.079749775 | 0.9790324421          | 1.16608414            | 4.71E-29 | 4.15E-26            |
| ENSG00000113430_LINE2<br>265_IRX4_I      | IRX4    | 1.035674077 | 0.8818873262          | 1.181428961           | 2.67E-07 | 0.0001174700<br>987 |
| ENSG00000159387_LINE2<br>406_IRX6_I      | IRX6    | 1.035674077 | 0.8818873262          | 1.181428961           | 2.67E-07 | 0.0001174700<br>987 |
| ENSG00000105991_LINE2<br>206_HOXA1_D_N1  | HOXA1   | 1.031548681 | 0.8952648341          | 1.147233213           | 4.55E-06 | 0.0016026712<br>85  |

**Supplementary Table 13: Differentially-accessible motifs in putative regulatory regions.** Differentially-accessible transcription factor motifs within sets of putative lineage-priming regulatory elements identified using chromVAR<sup>3</sup>.

## Supplementary Table 14

| Parameter                                   | Default                                                                                  | CTCF footprinting                 |
|---------------------------------------------|------------------------------------------------------------------------------------------|-----------------------------------|
| Length of input genomic intervals           | 50,000 bp                                                                                | 200 bp                            |
| Padding on either side of genomic intervals | 5,000 bp                                                                                 | 200 bp                            |
|                                             |                                                                                          |                                   |
| Number of residual blocks                   | 7 total (5 followed by regression output, then 2 more followed by classification output) |                                   |
| Kernel size                                 | 51 (for all convolutional layers)                                                        | 11 (for all convolutional layers) |
| Dilation                                    | 8 (for all convolutional layers)                                                         | 1 (for all convolutional layers)  |
| Number of channels                          | 15 (for all convolutional layers)                                                        | 32 (for all convolutional layers) |
| Batch size                                  | 64                                                                                       |                                   |
|                                             |                                                                                          |                                   |
| <b>Weights for loss functions:</b>          |                                                                                          |                                   |
| Mean squared error                          | 0.0005                                                                                   | 0.008                             |
| 1 - Pearson correlation coefficient         | 1                                                                                        | 20                                |
| Binary cross-entropy                        | 1                                                                                        | 1                                 |
|                                             |                                                                                          |                                   |
| <b>Metric to choose best model</b>          | AUROC                                                                                    | Pearson correlation               |

**Supplementary Table 14: Model parameters.** Parameters used to train the AtacWorks ResNet models described in this paper.

## Supplementary Figure 1

### Clean ATAC-Seq (50 million reads)

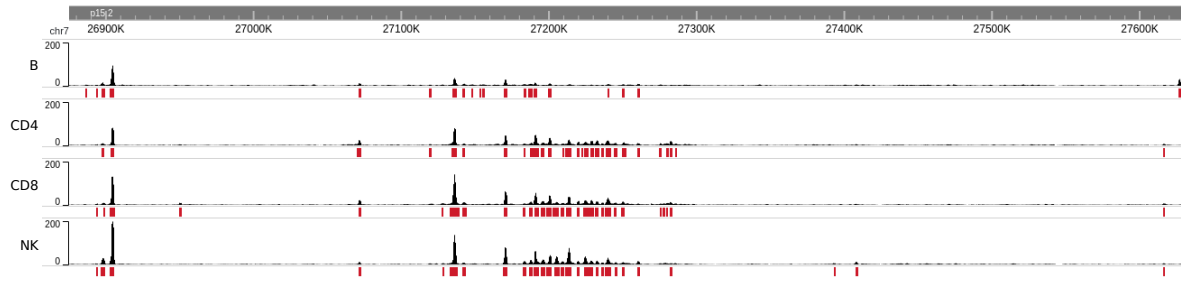

### Noisy ATAC-Seq (1 million reads)

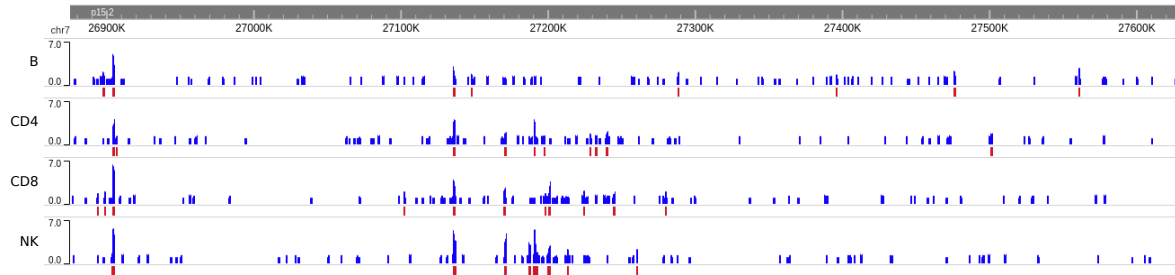

**Supplementary Figure 1: Bulk ATAC-seq data used to train AtacWorks.** Clean (black) and noisy (blue) ATAC-seq signal tracks for the 4 ATAC-seq datasets (CD4+ T cells, CD8+ T cells, B cells and NK cells) used for training the deep learning model. NK cells: Natural Killer cells.

## Supplementary Figure 2

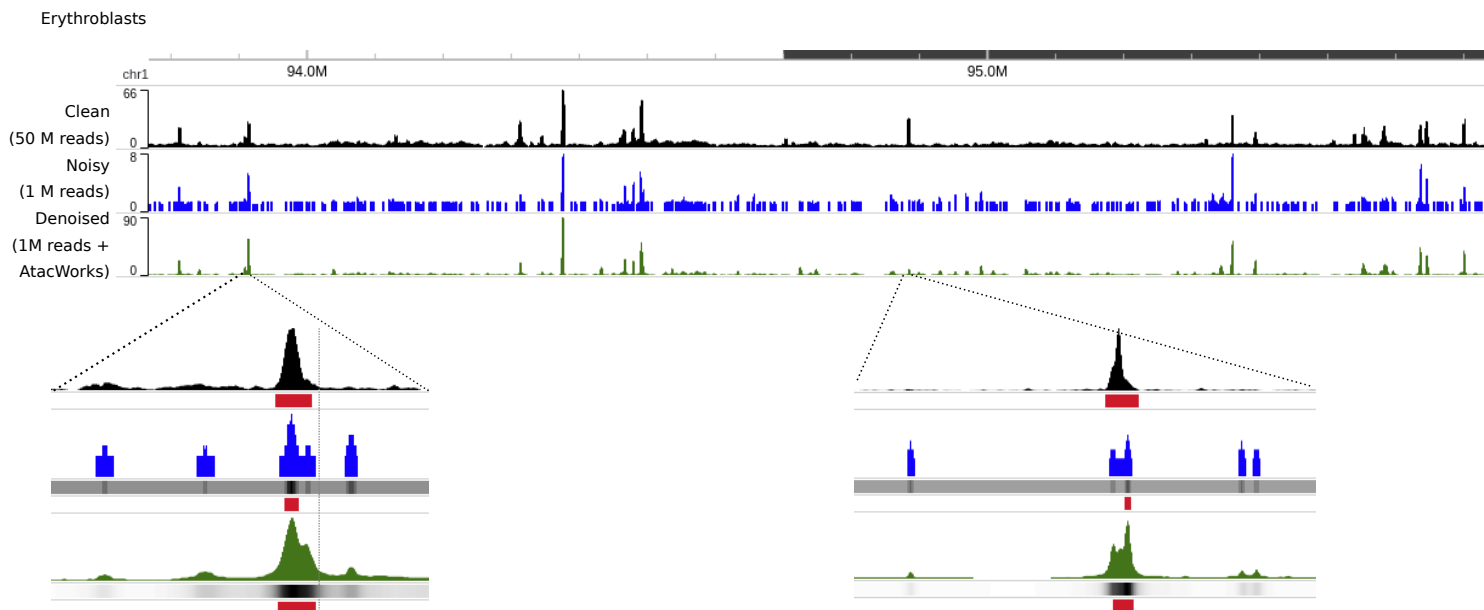

**Supplementary Figure 2: AtacWorks denoises low-coverage bulk ATAC-seq from human erythroblasts.** Clean (black), noisy (blue) and denoised (green) ATAC-seq signal tracks for bulk ATAC-seq data from erythroid cells. Detailed views of two peaks are shown. Below the noisy (blue) signal tracks, the heatmaps show the negative log of the p-value returned by MACS2 for each position and the red bars show peak calls by MACS2 using a p-value cutoff of  $10^{-3}$ . Below the denoised (green) signal tracks, the heatmaps show the probability returned by AtacWorks (representing the probability that each position is part of a peak) and the red bars show peak calls by AtacWorks using a probability cutoff of 0.5.

### Supplementary Figure 3

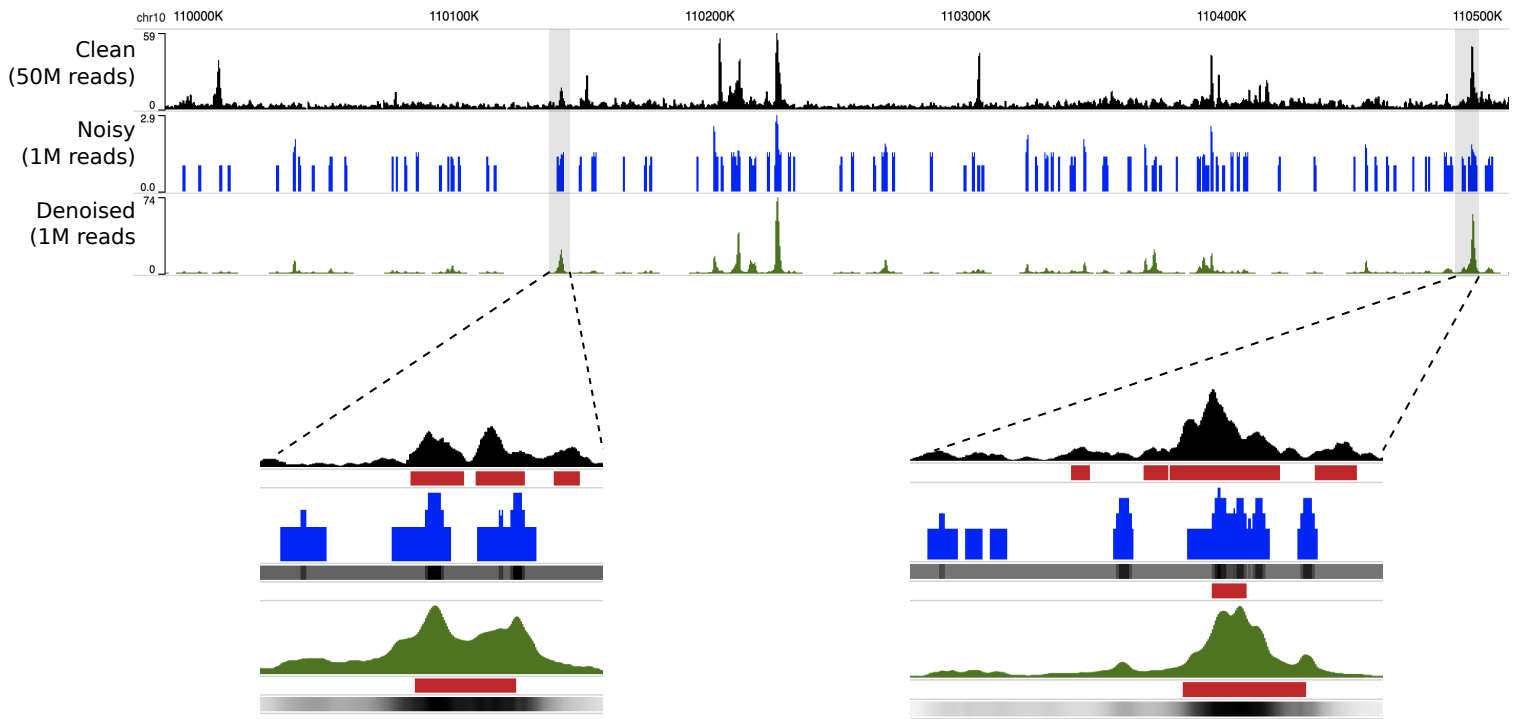

**Supplementary Figure 3: AtacWorks denoises low-coverage bulk ATAC-seq data from the human Peyer's Patch.** Clean (black), noisy (blue) and denoised (green) ATAC-seq signal tracks for ENCODE bulk ATAC-seq data from the Peyer's Patch. Detailed views of two regions are shown. Below the noisy (blue) signal tracks, the heatmaps show the negative log of the p-value returned by MACS2 for each position and the red bars show peak calls by MACS2 using a p-value cutoff of  $10^{-3}$ . Below the denoised (green) signal tracks, the heatmaps show the probability returned by AtacWorks (representing the probability that each position is part of a peak) and the red bars show peak calls by AtacWorks using a probability cutoff of 0.5.

## Supplementary Figure 4

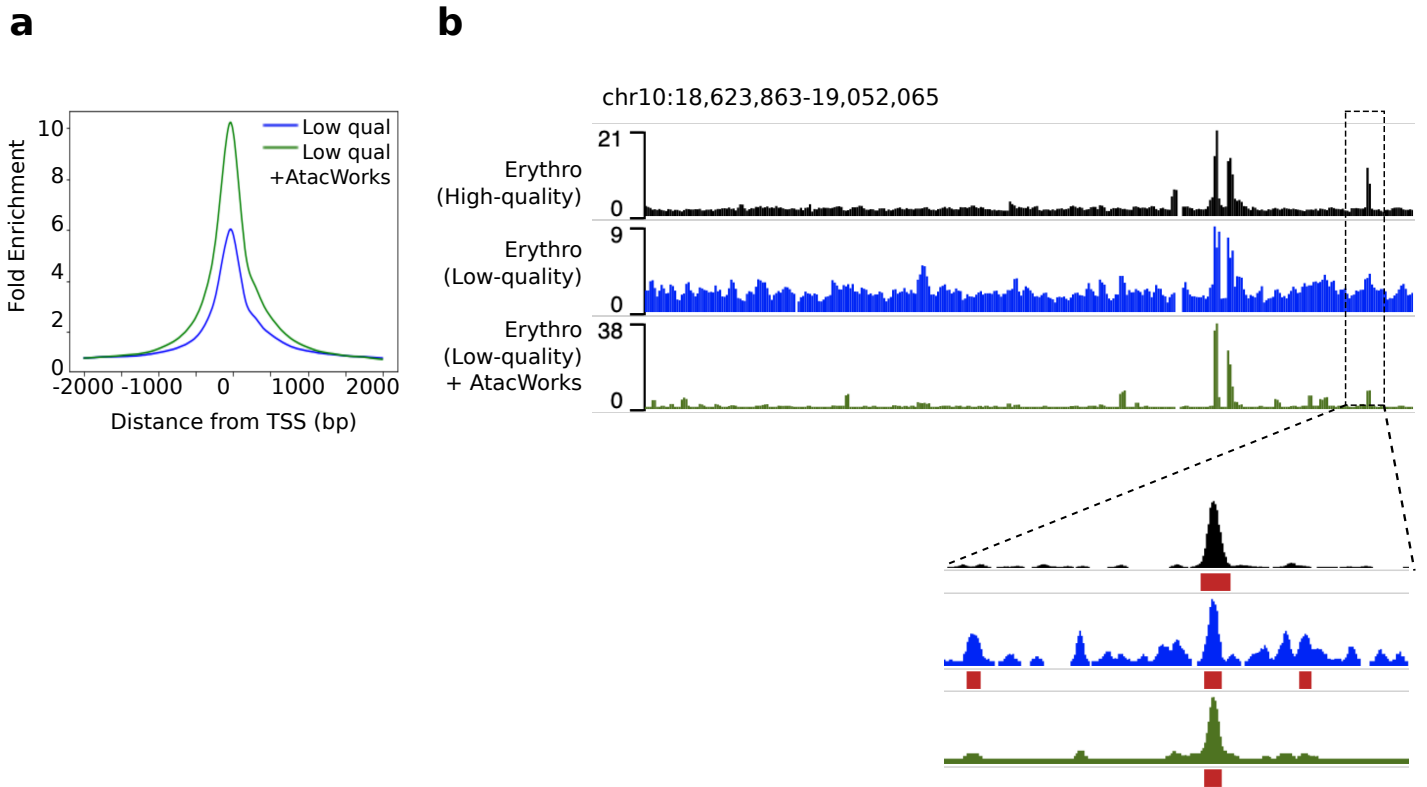

### Supplementary Figure 4: AtacWorks improves the signal-to-noise ratio in low-quality ATAC-seq.

(a) Average ATAC-seq signal over 4000-bp windows centered on transcription start sites, in low-quality ATAC-seq data from erythroblasts, before (blue) and after (green) denoising with AtacWorks. (b) ATAC-seq signal tracks for high-quality (black) and low-quality (blue) data from erythroblasts, and low-quality data after denoising by AtacWorks (green). Red bars below the tracks show peak calls by MACS2 (for the high and low-quality tracks) and AtacWorks (for the denoised track). Source data are provided as a Source Data file.

## Supplementary Figure 5

**a**

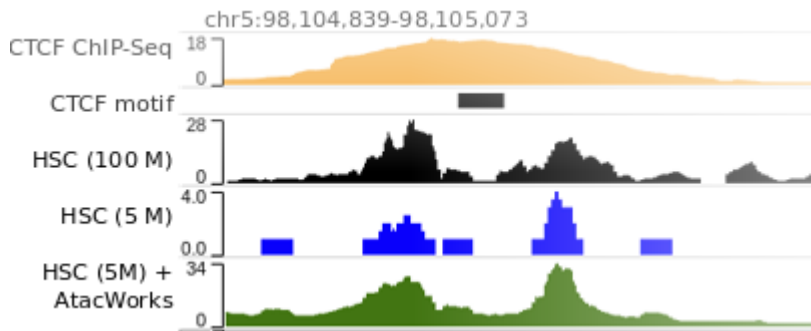

**b**

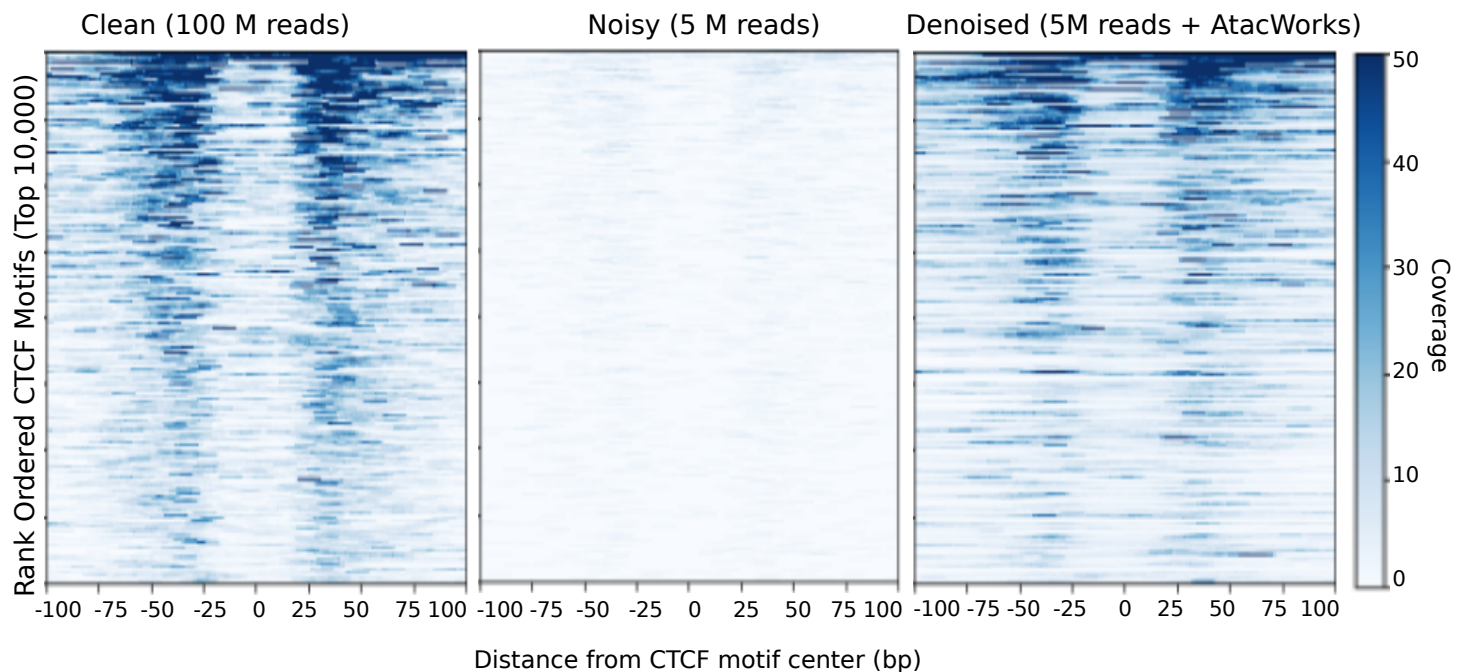

**Supplementary Figure 5: Enhancing transcription factor footprints with AtacWorks.** (a) Signal tracks around a CTCF binding site in HSCs. From top to bottom: CTCF ChIP-seq signal (yellow), ATAC-seq signal at a depth of 100 million reads (black), subsampled to 5 million reads (blue), and subsampled signal denoised by AtacWorks (green). The black bar underneath the ChIP-seq track shows the CTCF binding motif. (b) Heatmaps showing the signal at 10,000 genomic regions surrounding CTCF motifs (rows) in clean (100 million read), noisy (downsampled to 5 million reads) and denoised signals. Color intensity represents sequencing coverage. CTCF: CCCTC-binding factor. Source data are provided as a Source Data file.

## Supplementary Figure 6

chr10:103779454-104715404

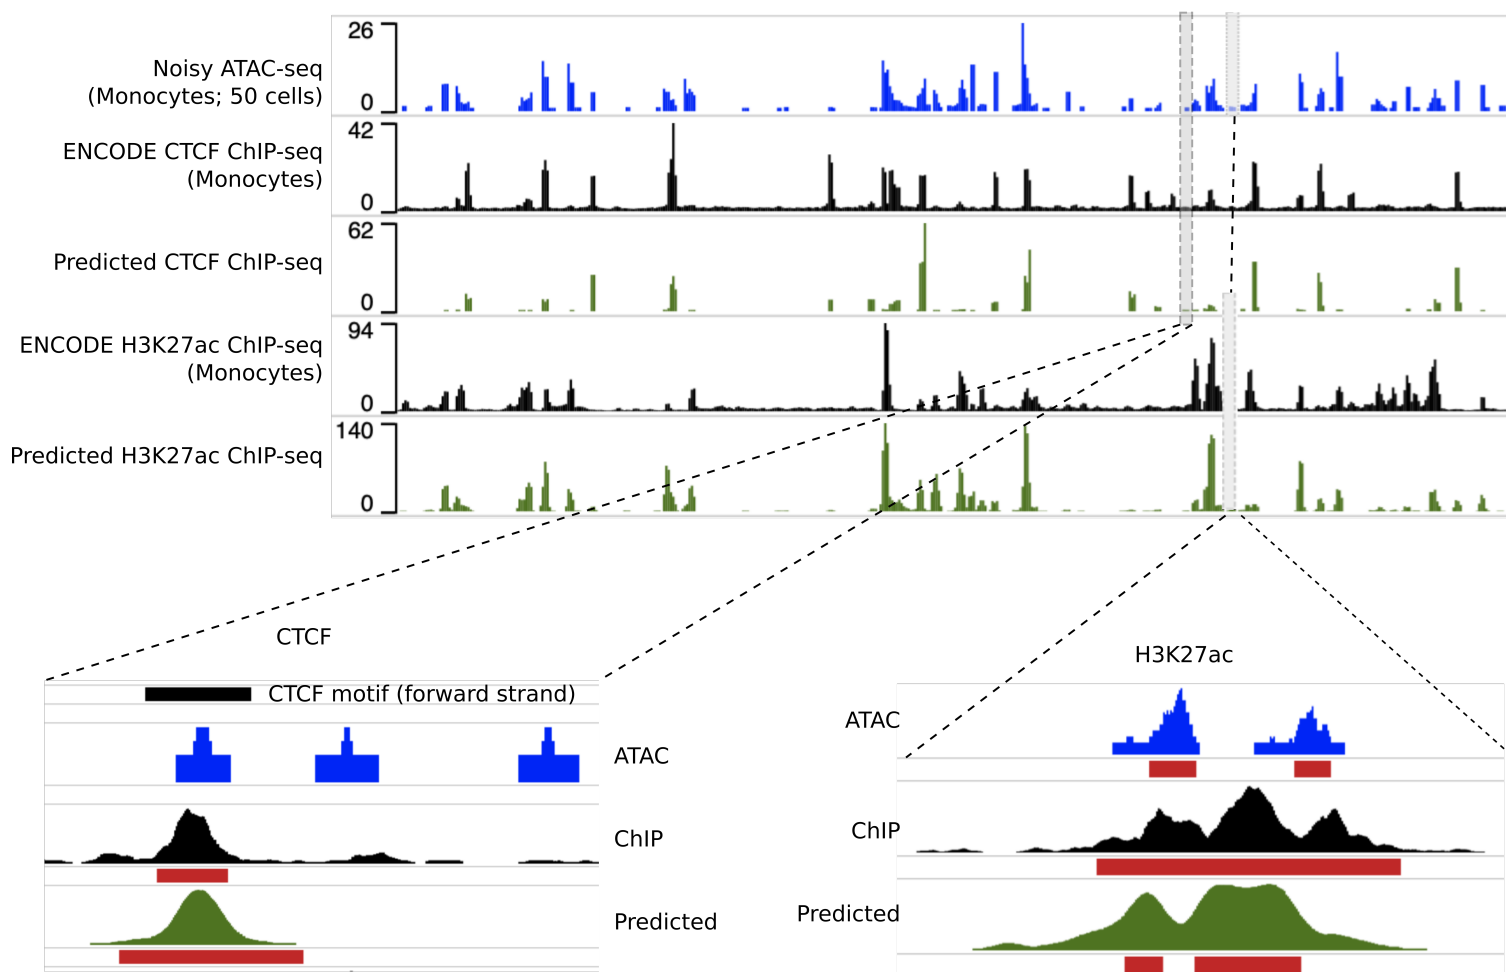

**Supplementary Figure 6: Cross-modality prediction of ChIP-seq signal from ATAC-seq.** From top to bottom: Noisy aggregate single-cell ATAC-seq (dscATAC) signal from 50 monocytes (blue). ENCODE ChIP-seq signal for CTCF in monocytes (black). CTCF ChIP-seq signal predicted by AtacWorks from the noisy ATAC-seq data (green). ENCODE ChIP-seq signal for H3K27ac in monocytes (black). H3K27ac ChIP-seq signal predicted by AtacWorks from the noisy ATAC-seq data (green). Detailed views of two regions are shown, one for CTCF ChIP-seq and one for H3K27ac ChIP-seq. Red bars below the signal tracks represent peak calls from MACS2 (for noisy ATAC-seq and ENCODE ChIP-seq) or AtacWorks (for predicted ChIP-seq). CTCF: CCCTC-binding factor.



## Supplementary Figure 7

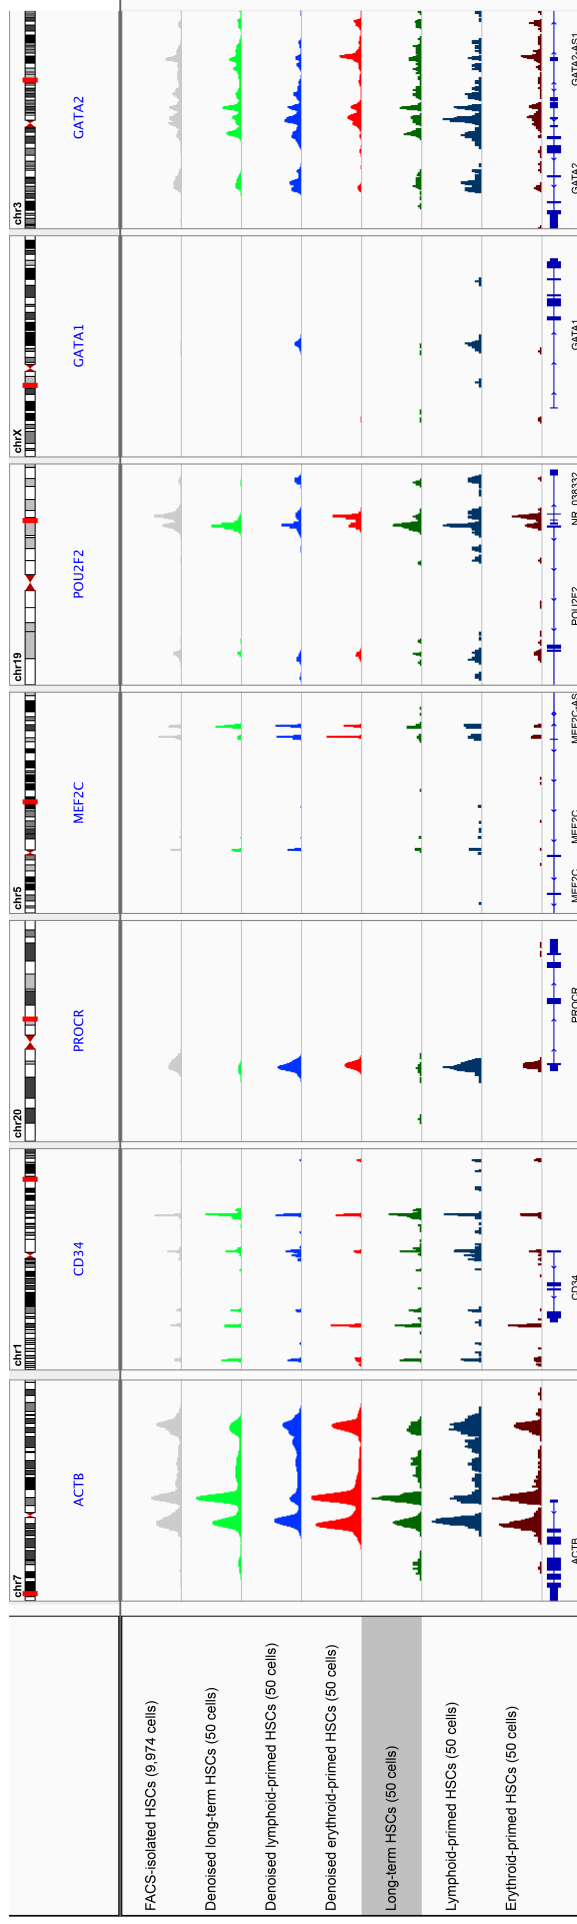

**Supplementary Figure 7: AtacWorks denoises dscATAC-seq data from human HSCs.** Noisy and denoised ATAC-seq signal tracks for the three aggregated subsamples from Fig. 3. Each subsample was generated by selecting a single HSC and identifying the 50 most similar cells. A track for the aggregated FACS-isolated HSCs is also provided for reference. Selected regions contain genes that have been implicated in lineage priming<sup>4, 5</sup>. dscATAC: Droplet Single-Cell ATAC-seq. HSC: hematopoietic stem cell.

Supplementary Figure 8

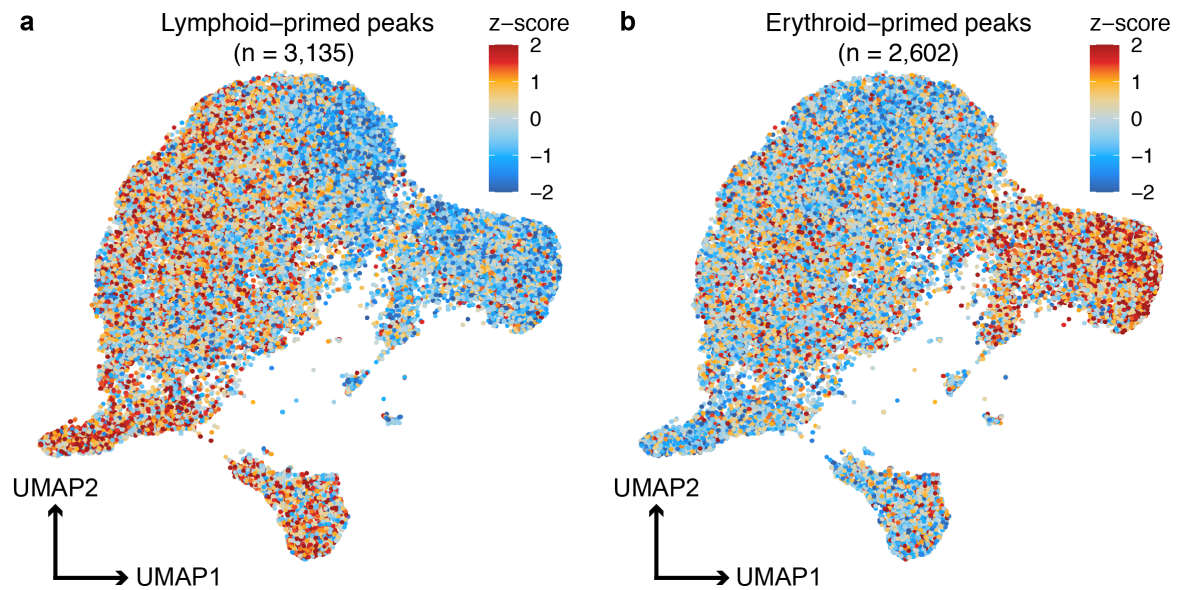

**Supplementary Figure 8: Validating the association of regulatory elements with lineage priming.** a) A combined UMAP dimensionality reduction of single-cell ATAC-seq profiles from 9,974 HSCs and 28,505 previously-published bead-enriched CD34+ bone marrow progenitor cells<sup>6</sup>. Each cell is colored by a combined chromatin accessibility z-score for 3,135 putative lymphoid-primed peaks identified through permutation analysis and filtering. Compare to Fig. 3b for CD34+ cell type identities. (b) Same as (a), but for 2,606 putative erythroid-primed peaks. HSC: hematopoietic stem cell. Source data are provided as a Source Data file.

Supplementary Figure 9

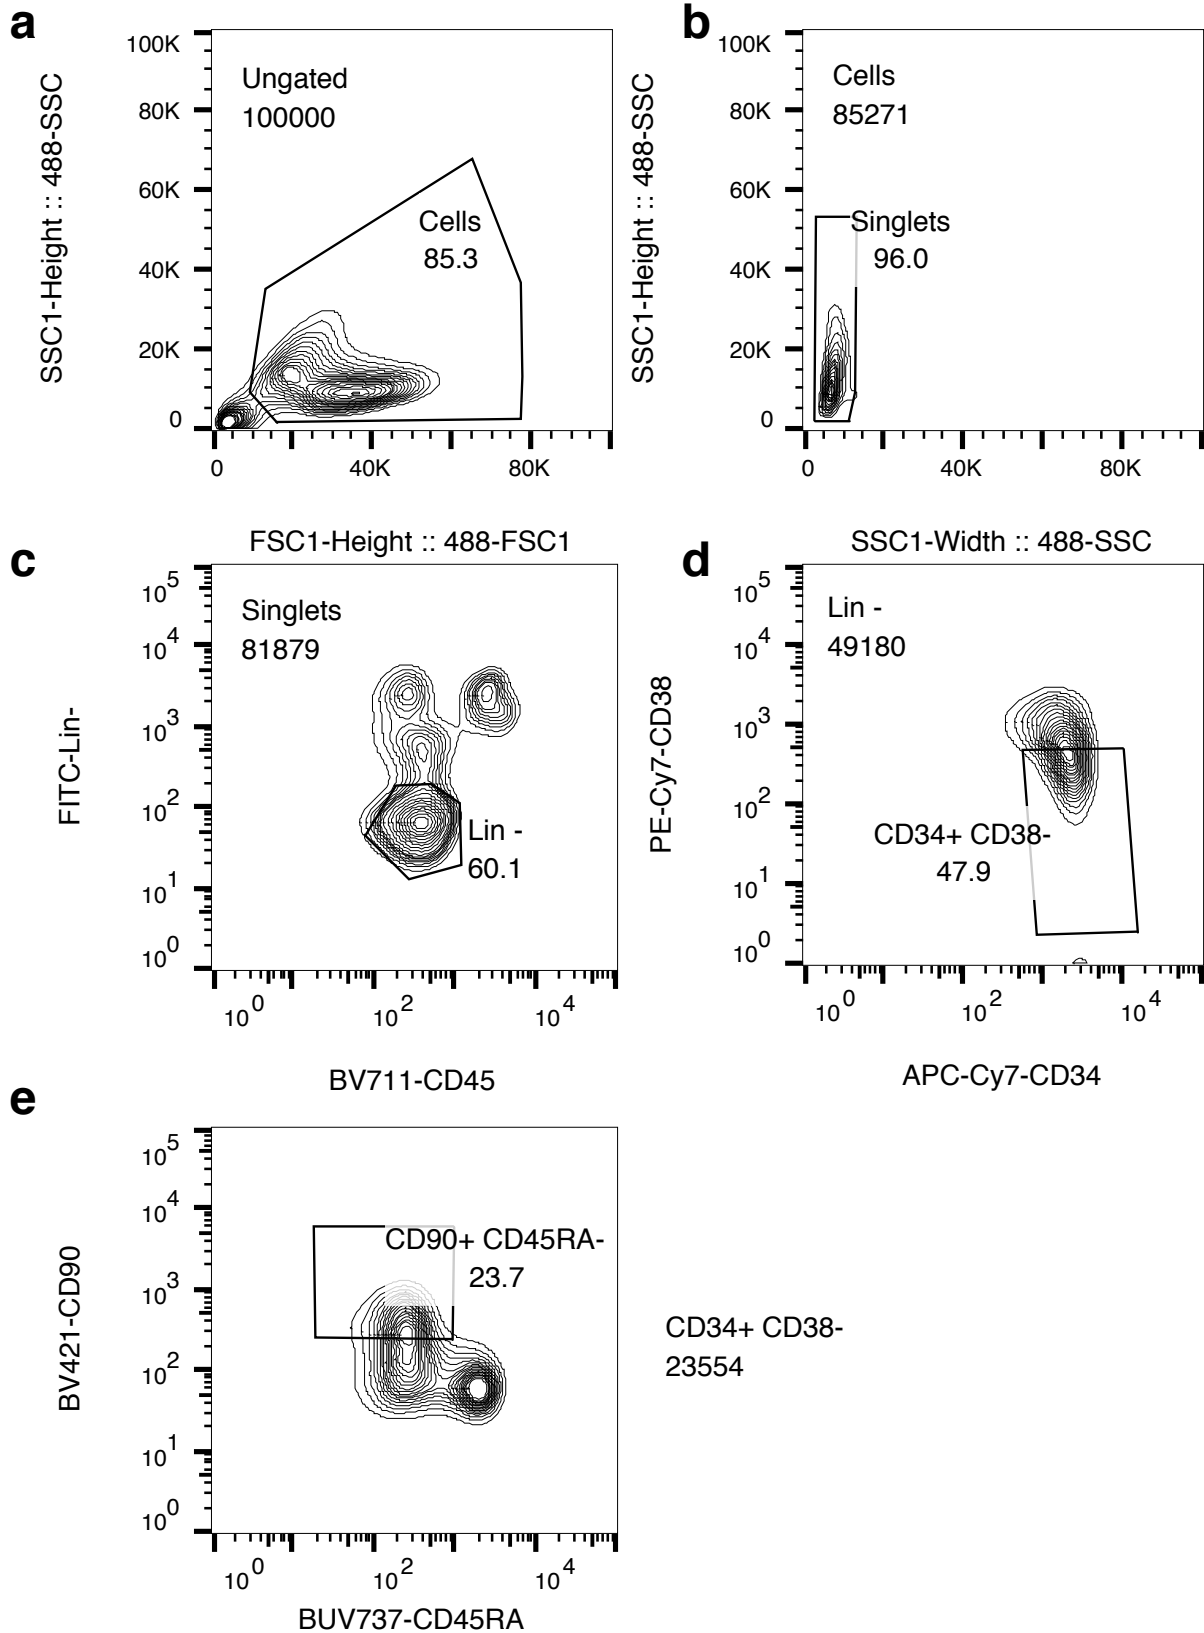

**Supplementary Figure 9: Representative example of the sorting strategy used to sort HSCs (CD45+ Lin- CD38- CD34+ CD45RA- CD90+ fraction).** The sorting order is shown in the figure (a to e), with the events selected in the gate in plot 1 used in plot 2, events selected in the gate in plot 2 used in plot 3, etc. The analysis was started with 100,000 events and the percentage of events in each gate is shown on the plot, with the total number of events selected in each gate shown in the subsequent plot. The analysis was done using FlowJo v10.7. HSC: hematopoietic stem cell.

## Supplementary References

1. Rai, V. *et al.* Single-cell ATAC-Seq in human pancreatic islets and deep learning upscaling of rare cells reveals cell-specific type 2 diabetes regulatory signatures. *Mol Metab* **32**, 109–121 (2020).
2. Koh, P. W., Pierson, E. & Kundaje, A. Denoising genome-wide histone ChIP-seq with convolutional neural networks. *Bioinformatics* **33**, i225–i233 (2017).
3. Schep, A. N., Wu, B., Buenrostro, J. D. & Greenleaf, W. J. chromVAR: inferring transcription-factor-associated accessibility from single-cell epigenomic data. *Nat. Methods* **14**, 975–978 (2017).
4. Buenrostro, J. D. *et al.* Integrated Single-Cell Analysis Maps the Continuous Regulatory Landscape of Human Hematopoietic Differentiation. *Cell* **173**, 1535–1548.e16 (2018).
5. Weinreb, C., Rodriguez-Fraticelli, A., Camargo, F. D. & Klein, A. M. Lineage tracing on transcriptional landscapes links state to fate during differentiation. *Science* **367**, (2020).
6. Lareau, C. A. *et al.* Droplet-based combinatorial indexing for massive-scale single-cell chromatin accessibility. *Nat. Biotechnol.* **37**, 916–924 (2019).
