# Supplementary material for: Deep learning-based enhancement of epigenomics data with AtacWorks
Source: PubMed Central journal article supplement (PMC7940635; doi:10.1038/s41467-021-21765-5), 2021-03-08
Supplement: 41467_2021_21765_MOESM3_ESM.pdf [file 41467_2021_21765_MOESM3_ESM.pdf]

## Description of Additional Supplementary Files

**Supplementary Data 1: Performance of AtacWorks on dscATAC data from mouse brain cells.** The performance of AtacWorks was measured on dscATAC data from mouse brain excitatory neurons (EN04 and EN12). The ResNet models used were trained on dscATAC data from human B cells and monocytes. MSE: Mean Squared Error. AUPRC: Area Under the Precision-Recall Curve. AUROC: Area Under the Receiver-Operator Characteristic. dscATAC: Droplet Single-Cell ATAC-seq.

**Supplementary Data 2: Cross-modality prediction with AtacWorks.** Performance of AtacWorks in predicting CTCF and H3K27ac ChIP-seq from noisy ATAC-seq. ResNet models were trained using aggregate single-cell ATAC-seq (dscATAC) data from B cells and tested on aggregate dscATAC data from monocytes.

**Supplementary Data 3: Putative lineage priming regulatory regions.** Genomic regulatory regions with significant changes in chromatin accessibility relative to a permuted background in subsamples of lineage-primed hematopoietic stem cells. Significance values were calculated using a two-sided z-test, converted to p-values, and adjusted for multiple comparisons using the Benjamini-Hochberg procedure.
